# Supplementary material for: Identifying the Multitarget Pharmacological Mechanism of Action of Genistein on Lung Cancer by Integrating Network Pharmacology and Molecular Dynamic Simulation
Source: MDPI journal article supplement (doi:10.3390/molecules29091913), 2024-04-23
Supplement: s1 [file s1]

## Supplementary Data

### Identifying the multi-target pharmacological mechanism of action of genistein on lung cancer by integrating network pharmacology and molecular dynamics simulation

**Table S1:** Molecular docking and binding free energy results of Genistein and selected compounds.

| Target-complex   | Docking Score<br>(kcal/mol) | MM-GBSA score<br>(kcal/mol) |
|------------------|-----------------------------|-----------------------------|
| AKT1-Genistein   | -8.89                       | -47.77                      |
| AKT1-MK2206      | -8.50                       | -71.06                      |
| AKT1-H-89        | -6.45                       | -51.18                      |
| EGFR-Genistein   | -7.80                       | -42.30                      |
| EGFR-Afatinib    | -8.38                       | -59.86                      |
| EGFR-Compound20a | -12.11                      | -92.90                      |
| STAT3-SD-36      | -13.25                      | -86.33                      |
| STAT3-genistein  | -4.33                       | -33.70                      |

**Table S2:** 2D interactions of genistein and selected compounds with AKT1.

| Compound Name | Hydrogen bond (length in Å)                           | Hydrophobic bond (length in Å)                                                                                                                                                                                                                                  | $\pi$ -cation                                        |
|---------------|-------------------------------------------------------|-----------------------------------------------------------------------------------------------------------------------------------------------------------------------------------------------------------------------------------------------------------------|------------------------------------------------------|
| Genistein     | Gln <sup>79</sup> (2.22)<br>Ser <sup>205</sup> (2.01) | Gln <sup>79</sup> (3.88)<br>Leu <sup>210</sup> (3.77)<br>Leu <sup>210</sup> (3.77)                                                                                                                                                                              | -----                                                |
| MK-2206       | Asn <sup>53</sup> (2.20)<br>Tyr <sup>272</sup> (1.89) | Trp <sup>80</sup> (3.77)<br>Trp <sup>80</sup> (3.85)<br>Leu <sup>210</sup> (3.81)<br>Leu <sup>264</sup> (3.80)<br>Val <sup>270</sup> (3.96)<br>Val <sup>270</sup> (3.70)<br>Tyr <sup>272</sup> (3.66)<br>Tyr <sup>272</sup> (3.58)<br>Asp <sup>274</sup> (3.77) | -----                                                |
| H-89          | Gln <sup>79</sup> (1.77)                              | Asn <sup>53</sup> (3.95)<br>Gln <sup>79</sup> (3.56)<br>Gln <sup>79</sup> (3.92)<br>Trp <sup>80</sup> (3.89)<br>Trp <sup>80</sup> (3.59)<br>Leu <sup>210</sup> (3.72)<br>Val <sup>270</sup> (3.46)<br>Val <sup>270</sup> (3.85)                                 | Trp <sup>80</sup> (3.74)<br>Trp <sup>80</sup> (3.98) |

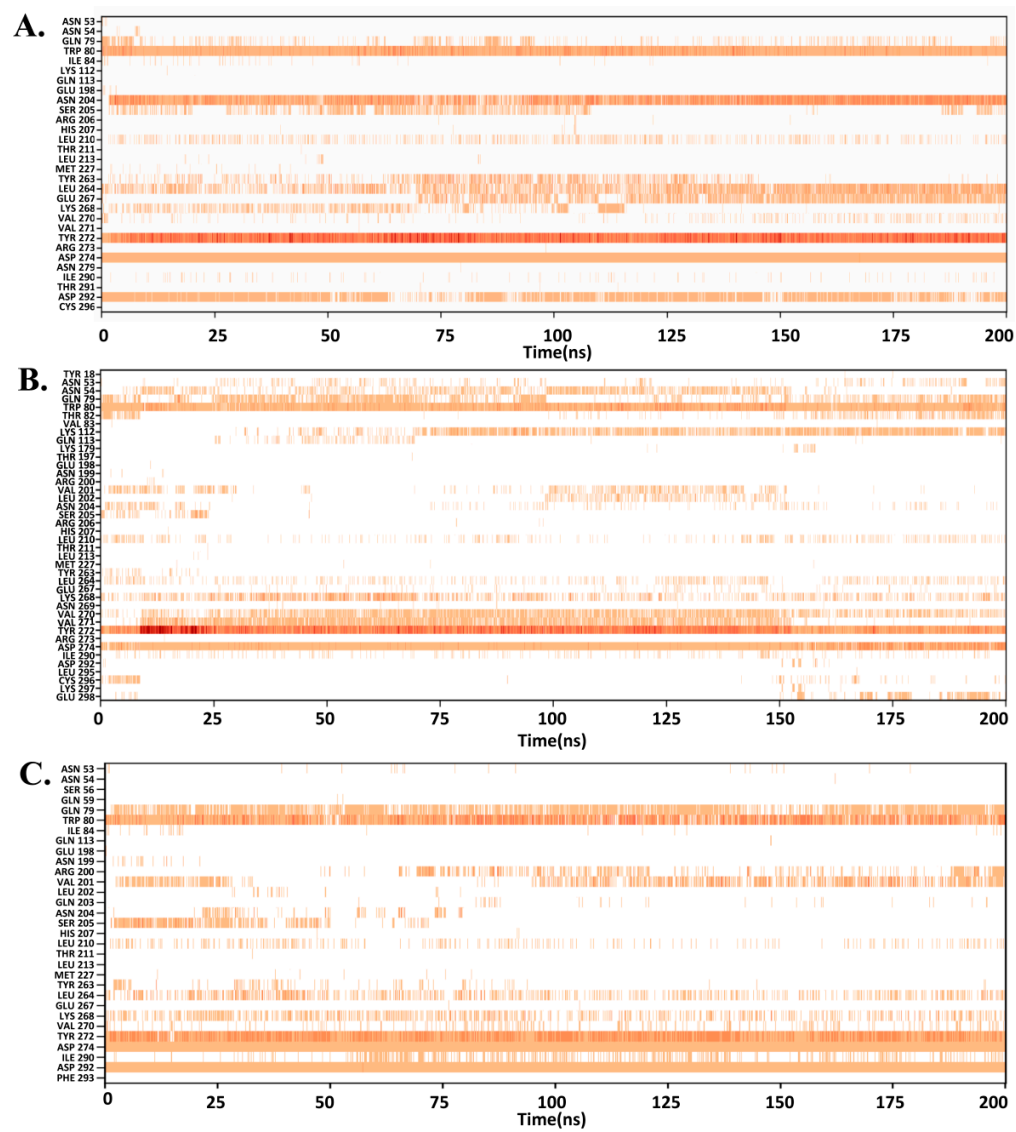

**Figure S1:** Time-dependent contacts between MK-2206 and AKT1 of **A)** Run 1, **B)** Run 2, and **C)** Run 3.

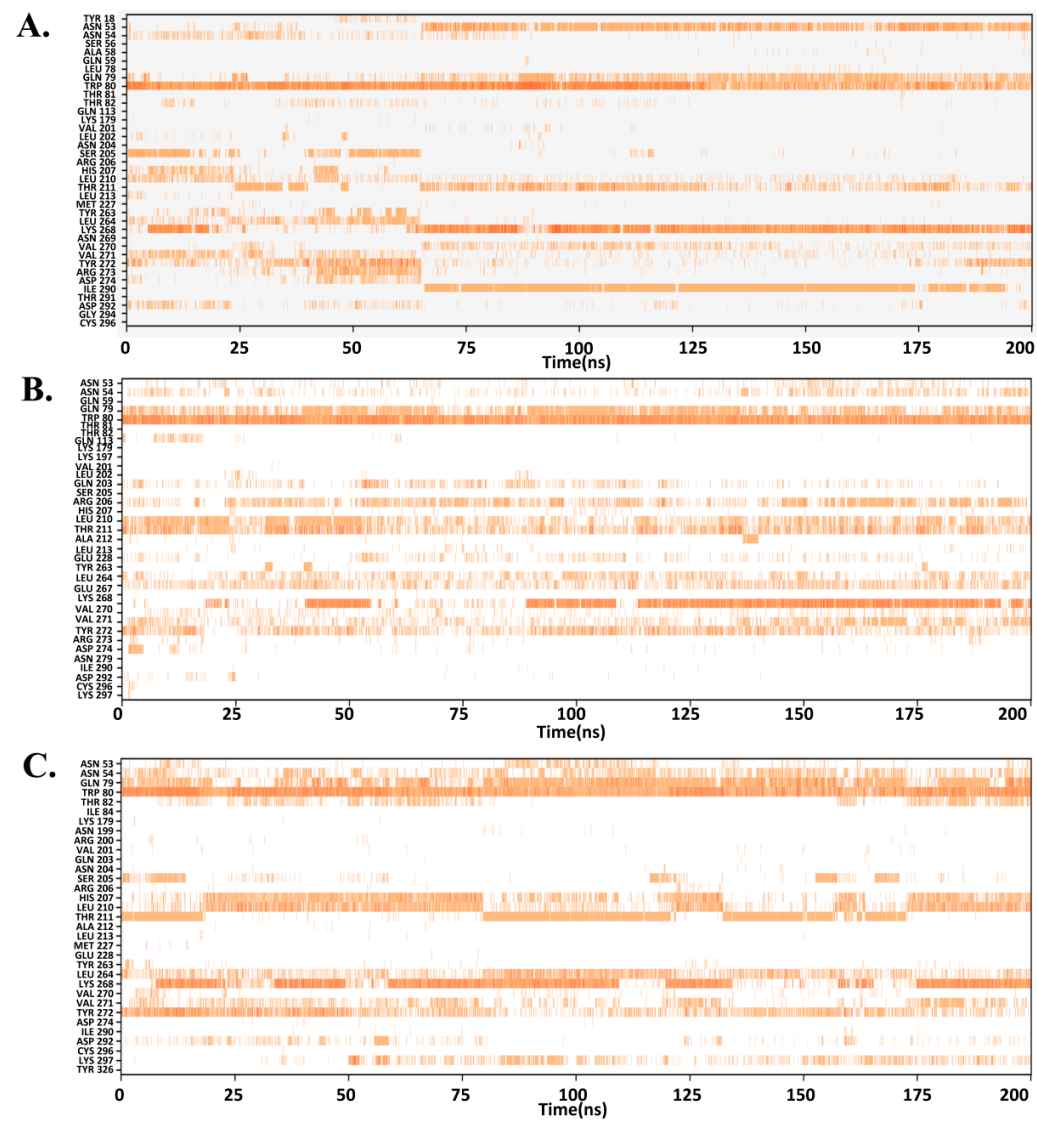

**Figure S2:** Time-dependent contacts between genistein and AKT1 of **A)** Run 1, **B)** Run 2, and **C)** Run 3.

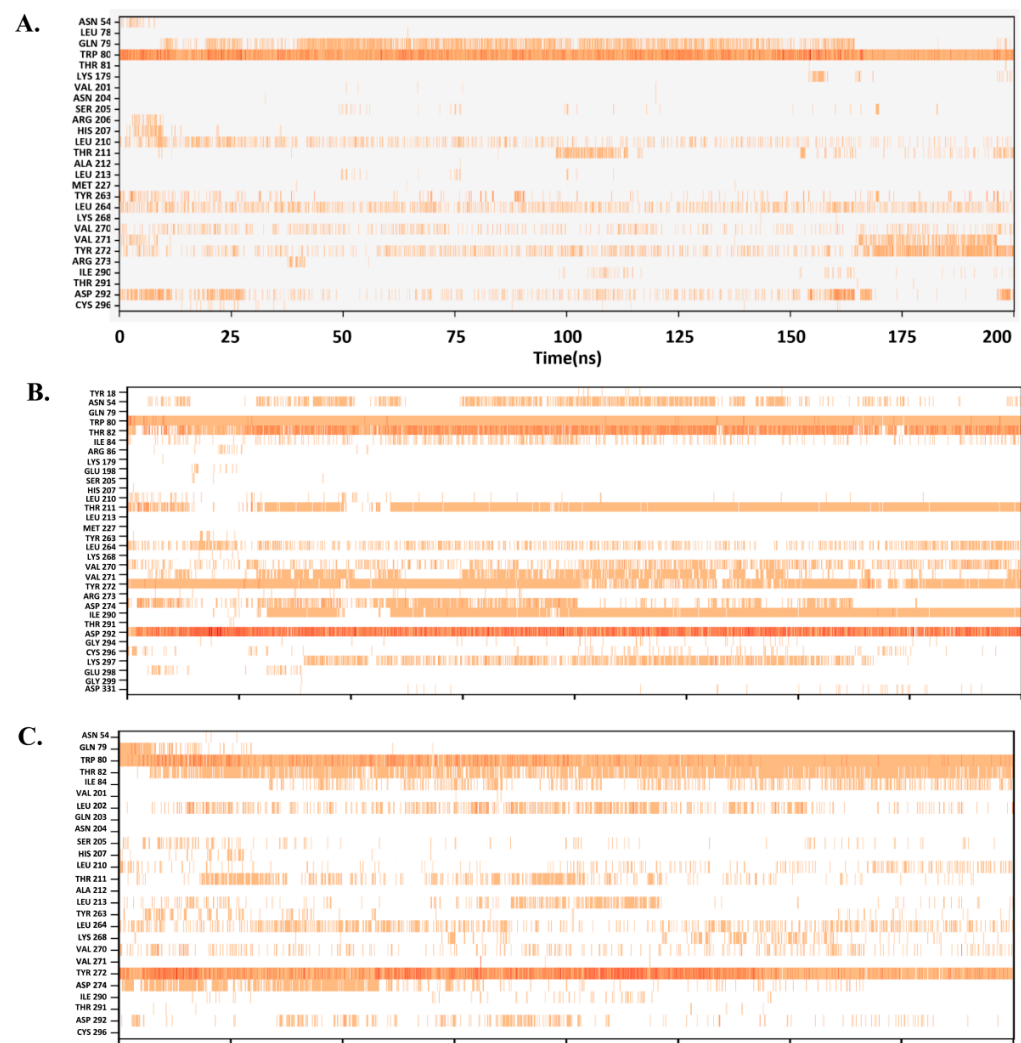

**Figure S3:** Time-dependent contacts between H-89 and AKT1 of **A)** Run 1, **B)** Run 2, and **C)** Run 3.
